# Supplementary material
Source: PubMed Central journal article supplement (PMC2889586)
Supplement: 1002024107_pnas.1002024107_SI.pdf [file 1002024107_pnas.1002024107_SI.pdf]

# Supporting Information

Xu et al. 10.1073/pnas.1002024107

## SI Text

**SI Material and Methods. Cell culture.** Chemically defined and feeder-free human embryonic stem cell (hESC) culture was described briefly as following. hESCs were grown on Matrigel-coated tissue culture plates in N2B27-CDM [DMEM-F12 supplemented with 1× N2 supplements, 1× B27 supplements, 2 mM L glutamine, 0.11 mM 2-mercaptoethanol, 1× nonessential amino acids, and 0.5 mg/mL BSA (fraction V)] and 20 ng/mL bFGF. Human ESCs were passaged every five to six days with 0.05% trypsin. Murine ESCs are cultured in knockout DMEM (Invitrogen) supplement with 2 mM L glutamine, 1× nonessential amino acids, 15% serum replacement (Invitrogen), and 1 × 10<sup>3</sup> ng/mL leukemia inhibitory factor (LIF) (Invitrogen).

For clonal survival assays, single hESCs were diluted to clonal density and plated onto 96-well Matrigel-coated plate. For low-density survival assays, 500 cells were plated onto 96-well Matrigel-coated plate. To visualize hESC colonies, cultures were fixed in 4% paraformaldehyde in phosphate buffered saline (PBS) for 5 min, washed once in PBS, then stained for alkaline phosphatase (ALP) activity as described in the manufacturer's instructions. ALP positive colonies were counted on an inverted microscope.

For growing hESCs in mouse medium, HES2, HUES7, HUES9, and HUES1-Oct4-GFP were cultured in murine ESC (mESC) growth media supplemented with 1-μM mitogen-activated protein kinase/extracellular signal-regulated kinase kinase (MEK) inhibitor PD0325901 and 5-μM p38 inhibitor SB202190 and 1 × 10<sup>3</sup> human LIF (Invitrogen).

**Reagents.** The ALP detection kit and integrin antibodies were from Chemicon. AG825 (Erb2 inhibitor), AG1478 (EGFR inhibitor), PPP (IGFR1 inhibitor), jasplakinolide, and cytochalasin D were purchased from Calbiochem. The antibody TS2/16 was purchased from Pierce. Antibodies to the extracellular domain of E-cadherin molecule were from Zymed and Millipore. β1-integrin blocking antibody was from BD Bioscience. Antibodies against extracellular signal-regulated kinase/MAPK, EGFR1, ERB2, GADPH, and the phosphorylated form of AKT were from Cell Signaling. Mouse monoclonal anti-phospho-FAK was from Upstate Biotechnology. Ptn and Tzv were added to culture medium at 2 μM. Exoenzyme C3 transferase was from Cytoskeleton Inc.

All chemicals used for compound synthesis were obtained commercially. NMR spectra were recorded on a Bruker (400 MHz) instrument. Chemical shifts (δ) were measured in ppm, and coupling constants (*J*) are reported in Hz. Liquid chromatography-mass spectrometry (LCMS) was performed by reverse-phase liquid chromatography-mass spectrometer Agilent 1100 LCMS system with API-ES ionization source. High pressure liquid chromatography was performed with C18 column with a linear gradient from 10% solvent A (acetonitrile with 0.035% trifluoroacetic acid) in solvent B (water with 0.05% trifluoroacetic acid) to 90% A in seven and a half minutes, followed by two and a half minutes elution with 90% A.

**Western blot analysis.** hESCs were dissociated by trypsin and cells were resuspended and plated onto 6-well tissue culture plates. After treatment with compounds or DMSO for the indicated times, cells were collected and resuspended in SDS sample buffer. Western blots were performed in standard fashion. E-cadherin and integrin antibodies were used as primary antibodies.

**Immunostaining analysis.** Immunostaining was performed as described previously (1). Briefly, cells were fixed with 4% para-

ormaldehyde at room temperature (RT) for 15 min. The cells were then incubated at RT in blocking buffer for 1 h. Primary antibody incubation was carried out overnight at 4 °C. The following commercially available antibodies were used at a concentration of 1:100 in blocking buffer: anti-SSEA4, anti-Oct4, anti-Nanog (Chemicon). The staining was visualized using secondary antibodies conjugated to FITC, Cy3, or Cy5 (Jackson ImmunoResearch).

**Target identification by affinity chromatography.** Synthesis of compound immobilized affinity matrixes: Compounds Tzv and its inactive analog (10 mg each) in DMSO (500 μL) and Et<sub>3</sub>N (10.4 μL) were added to Reacti-Gel (0.5 mL, 25 μmol) that was washed by DMSO in an Eppendorf vial. The reaction mixture was incubated at room temperature until the starting material disappeared (determined by HPLC). After disappearance of the starting material, ethanolamine (15 μL) was added and the resulting mixture was incubated at room temperature overnight to block the Reacti-Gel. The resulting affinity matrixes were washed thoroughly with DMSO (500 μL × 4), PBS (500 μL × 2), and stored at 4 °C in NaN<sub>3</sub> solution (0.1% in PBS). Affinity pull-down was performed as described previously. Briefly, whole cell lysates were pretreated with the unfunctionalized affinity matrix at 4 °C for 1.5 h. After washing three times, samples were incubated with the positive or negative affinity matrix at 4 °C for 1 h. After heat shock, samples were loaded and separated on a 4–20% Tris-Glycine SDS PAGE and silver stained with a Silver Stain Plus Kit (Bio-Rad). The differentially retained protein bands were cut, destained, and analyzed with LCMS.

**TUNEL assay.** The hESCs under different treatments were dissociated by trypsin and fixed by 4% paraformaldehyde. And the staining was carried out according to the manufacturer's instructions (MBL Laboratories). After staining, samples were analyzed by flow cytometry using a FACS Calibur flow cytometer (BD).

**Flow cytometry analysis.** To assess the expression of E-cadherin, activated integrin, and SSEA4, dissociated cells (3 × 10<sup>5</sup>) were washed with PBS and resuspended in PBS containing 2% goat serum. Cells were then incubated with the appropriate antibody for 1 h at 4 °C, washed with the blocking solution, and labeled with FITC-conjugated secondary antibody for 30 min at 4 °C. Cells were then washed and analyzed on a FACS Calibur flow cytometer.

**Teratoma Formation and Karyotyping.** Teratoma formation experiments were performed by injecting 3–5 million hESCs (maintained in the presence of compounds Tzv or Ptn) under the kidney capsule of nude mice. After four to five weeks, all mice developed teratomas, which were removed and then immunohistologically analyzed by The Scripps Research Institute Research Histology Service and Animal Resources. Compounds treated cells were karyotyped by standard G banding at the Children's Hospital Oakland, Cytogenetics Laboratory. No chromosomal abnormality was found in the 10 randomly picked nuclei.

**Cell adhesion assay.** Cell adhesion assays were performed in 96-well microtiter plates coated with Matrigel. After trypsin, hESCs were resuspended in the chemically defined media containing the indicated compounds. Cells were then added to the microtiter wells and incubated for 3 h at 37 °C. Unbound and loosely bound

cells were removed by shaking and washing, and the remaining cells were then fixed immediately. The wells were washed 3 times with 200  $\mu$ L of H<sub>2</sub>O, and attached cells were stained with Crystal Violet (Sigma). The absorbance of each well at 570 nm was then measured. For experiments with blocking antibodies, cells were preincubated with antibodies on ice for 30 min, and adhesion assays were performed in the presence of antibodies. Each sample was assayed independently three times.

**Rho and ROCK activation assay.** Rho activity was determined by measuring RhoA-GTP binding to glutathione S-transferase (GST)-RhoA-binding domain in a pull-down assay using a Rho assay reagent (Upstate). CycLex Rho-kinase assay kit (MBL) was used to detect Rho-kinase activity in lysates or to measure compound activity using recombinant Rho kinase.

**Endocytosis assay.** hESCs were incubated with 1.5 mg/mL sulfo-succinimidyl 2-(biotinamido) ethyl-dithiopropionate (sulfo-NHS-SS-biotin) (Pierce Chemical Co.) on ice, followed by washing and quenching. Endocytosis of E-cadherin was initiated by Ca<sup>2+</sup> depletion and 37 °C incubation. Cells were then incubated in two 20-min washes of glutathione solution (60 mM glutathione, 0.83 M NaCl, with 0.83 M NaOH and 1% BSA added before use) at 0 °C, which removed all cell surface biotin groups. Remaining biotinylated proteins were sequestered inside cells by endocytosis and were therefore protected from glutathione stripping. Biotinylated proteins were recovered on streptavidin beads and analyzed by SDS-PAGE. E-cadherins were detected by immunoblotting. Total level of surface E-cadherin before endocytosis was used as reference.

**Synthesis of *N*-benzyl-2-(pyrimidin-4-ylamino)thiazole-4-carboxamide (thiazovivin).** Benzyl amine was loaded to 4-formyl-3,5-dimethoxyphenoxy-methyl functionalized polystyrene resin (PAL) via reductive amination to give PAL-benzyl amine resin (2). A reaction flask containing PAL-benzyl amine resin (200 mg, 0.2 mmol), 2-bromothiazole-4-carboxylic acid (83 mg, 0.4 mmol), bis(2-oxo-3-oxazolidinyl)phosphinic chloride (BOP-Cl) (153 mg, 0.6 mmol), and diisopropylethylamine (0.17 mL, 1 mmol) in dimethylformamide (DMF) (3 mL) was shaken for 24 h at room temperature. The resin was washed with methanol and dichloromethane and dried in vacuo to give PAL resin-*N*-benzyl-2-bromothiazole-4-carboxamide, which was then added to a flame-dried reaction vial, followed by 4-aminopyrimidine (95 mg, 1 mmol), Pd<sub>2</sub>(dba)<sub>3</sub> (46 mg, 0.05 mmol), Xantphos (87 mg, 0.15 mmol), and NaOtBu (192 mg, 2 mmol). The vial was sure safe capped and degassed, then charged with argon and anhydrous dioxane (1.5 mL). The reaction was shaken for 24 h at 90 °C. The resin was washed with sodium diethyldithiocarbamate solution (0.05 M in DMF), methanol, and dichloromethane and dried in vacuo. The resin

was subsequently cleaved with cleavage cocktail TFA:CH<sub>2</sub>Cl<sub>2</sub>:H<sub>2</sub>O (45:55:5) (2 mL) for 2 h. The resin was filtered, and the filtrate was collected and evaporated in vacuo to give the crude, which was then purified by HPLC to give the title compound (30 mg, 48%).

Exact mass calculated for C<sub>15</sub>H<sub>13</sub>N<sub>5</sub>O<sub>3</sub>S: 311.1, found LCMS  $m/z$  = 334.1 (M + Na<sup>+</sup>).

<sup>1</sup>H NMR (400 MHz, *d*<sub>6</sub>-DMSO)  $\delta$  4.49 (d, *J* = 6.3 Hz, 2H), 5.76 (s, 1H), 7.21–7.27 (m, 2H), 7.30–7.34 (m, 4H), 7.85 (s, 1H), 8.45 (t, *J* = 6.3 Hz, 1H), 8.51 (d, *J* = 6.1 Hz, 1H), 8.94 (s, 1H); <sup>13</sup>C NMR (100.6 MHz, *d*<sub>6</sub>-DMSO)  $\delta$  42.2, 107.9, 117.8, 126.8, 127.2, 128.3, 139.4, 144.7, 154.4, 156.4, 157.0, 157.9, 160.7.

**Synthesis of *N*-(cyclopropylmethyl)-4-(4-(6-hydroxy-3,4-dihydroquinolin-1(2H)-yl)pyrimidin-2-ylamino)benzenesulfonamide (pyrintegrin).**

The reaction flask containing 2,4-dichloropyrimidine (372 mg, 2.5 mmol), 6-methoxy-1,2,3,4-tetrahydroquinoline (489 mg, 3 mmol), and diisopropylethylamine (0.52 mL, 3 mmol) in *n*-butanol (10 mL) was heated at 40 °C overnight. The solvent was evaporated, and the residue was purified by flash column chromatography to give 2-Chloro-4-(6-methoxy-3,4-dihydroquinolin-1(2H)-yl)pyrimidine (551 mg, 80%). This intermediate (250 mg, 0.91 mmol) was then dissolved in dichloromethane and treated with BBr<sub>3</sub> (1 M in dichloromethane) (1 mL, 1 mmol) at –78 °C. The reaction mixture was slowly warmed up to room temperature and stirred for 1 h, poured into water, extracted with dichloromethane. The combined organics were dried over anhydrous Na<sub>2</sub>SO<sub>4</sub> and concentrated. The residue was purified by flash column chromatography to give 2-Chloro-4-(6-hydroxy-3,4-dihydroquinolin-1(2H)-yl)pyrimidine (154 mg, 65%). To a stirred solution of 2-chloro-4-(6-hydroxy-3,4-dihydroquinolin-1(2H)-yl)pyrimidine (29 mg, 0.11 mmol) and 4-amino-*N*-(cyclopropylmethyl)benzenesulfonamide (27 mg, 0.12 mmol) in DMF (0.5 mL) was added *p*-toluenesulfonic acid (2 M in dioxane) (55  $\mu$ L, 0.11 mmol). The reaction mixture was stirred at 90 °C overnight, then purified by HPLC to give the title compound (27 mg, 56%).

Exact mass calculated for C<sub>23</sub>H<sub>25</sub>N<sub>5</sub>O<sub>3</sub>S: 451.2, found LCMS  $m/z$  = 452.3 (M + H<sup>+</sup>).

<sup>1</sup>H NMR (400 MHz, *d*<sub>6</sub>-DMSO)  $\delta$  0.05–0.09 (m, 2H), 0.32–0.36 (m, 2H), 0.75–0.81 (m, 1H), 1.90–1.95 (m, 2H), 2.64 (t, *J* = 6.4 Hz, 4H), 3.93 (t, *J* = 6.5 Hz, 2H), 6.59 (d, *J* = 7.1 Hz, 1H), 6.66–6.70 (m, 2H), 7.25–7.28 (m, 1H), 7.64 (t, *J* = 5.9 Hz, 1H), 7.74 (d, *J* = 8.8 Hz, 2H), 7.82 (d, *J* = 8.8 Hz, 2H), 8.01 (d, *J* = 7.1 Hz, 1H), 10.79 (s, 1H); <sup>13</sup>C NMR (100.6 MHz, *d*<sub>6</sub>-DMSO)  $\delta$  3.4, 10.6, 23.7, 26.1, 45.5, 47.2, 98.2, 112.9, 114.9, 119.7, 125.1, 127.5, 128.5, 134.6, 135.4, 141.7, 155.4, 159.2, 159.6, 161.0.

1. Yao S, et al. (2006) Long-term self-renewal and directed differentiation of human embryonic stem cells in chemically defined conditions. *Proc Natl Acad Sci USA* 103(18):6907–6912.

2. Ding S, Grey NS, Wu X, Ding Q, Schultz PG (2002) A combinatorial scaffold approach toward kinase-directed heterocycle libraries. *J Am Chem Soc* 124:1594–1596.





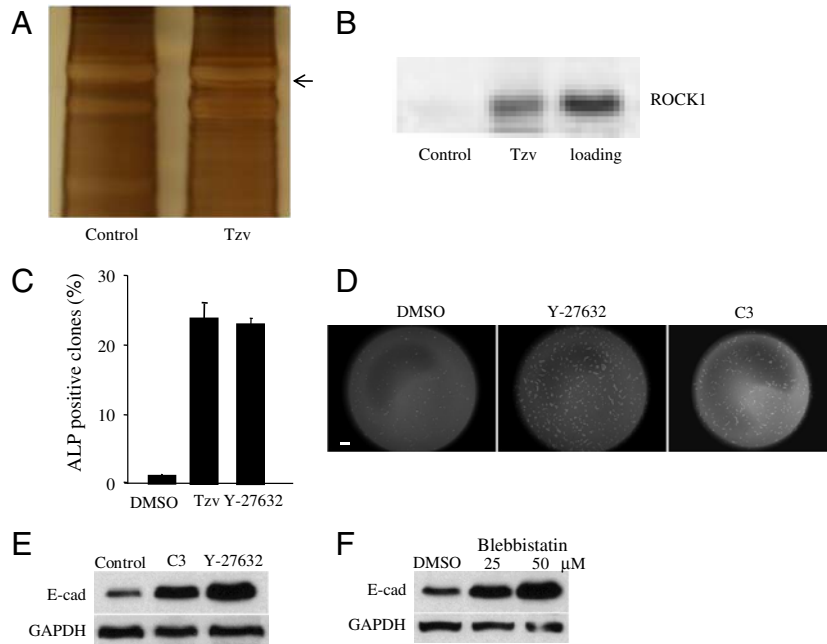

**Fig. 54.** Tzv is a ROCK inhibitor and Rho-ROCK axis regulates cell-ECM adhesion and cell-cell adhesion in hESCs. (A) One-dimensional SDS-PAGE for proteins pulled down on Tzv and control resins. Arrow indicates specific protein binding to Tzv, which is subjected to protein sequencing. (B) Affinity pull-down by Tzv and control resins and blotted by ROCK1 antibody. (C) Ratio of ALP positive colonies vs. total initially seeded cells ( $n = 2$ ). (D) Phase contrast images of hESCs 18 h after seeding on Matrigel-coated plates treated with the indicated compounds. Bar, 100  $\mu\text{m}$ . (E) Western blot showing E-cadherin expression in the presence of *Clostridium botulinum* C3 toxin and Y-27632. (F) Western blot showing E-cadherin expression in the presence of Blebbistatin.

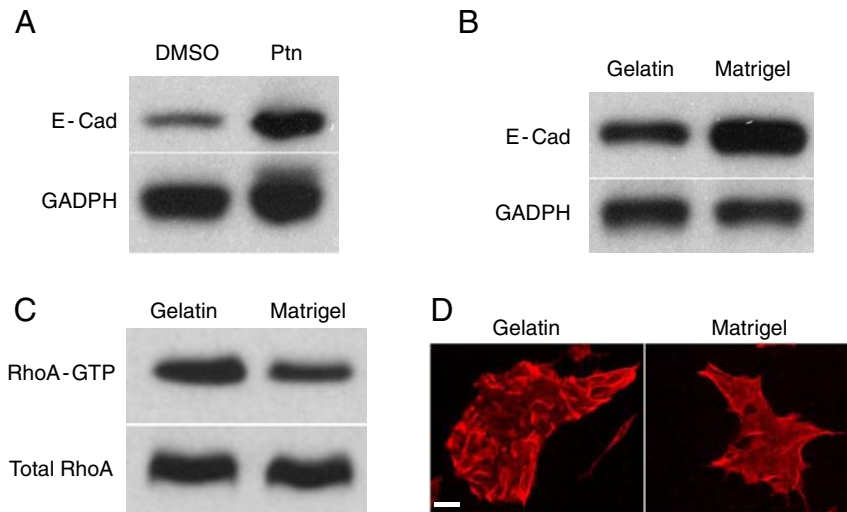

**Fig. 55.** Cell-ECM interaction regulates cell-cell interaction. (A) Western blot showing E-cadherin expression when hESCs were plated onto Matrigel-coated plates in the absence or presence of Ptn. (B) Western blot showing E-cadherin expression when hESCs were plated onto gelatin- or Matrigel-coated plates. (C) Western blot showing the active Rho level in hESCs 30 min after replating onto gelatin- or Matrigel-coated plates. (D) Immunostaining of Vimentin in hESCs grown on gelatin- or Matrigel-coated plates. High level vimentin expression in gelatin-plate cells suggested that cells are differentiated, while low level vimentin expression suggested that cells on Matrigel-coated plate are undifferentiated. Bar, 10  $\mu\text{m}$ .

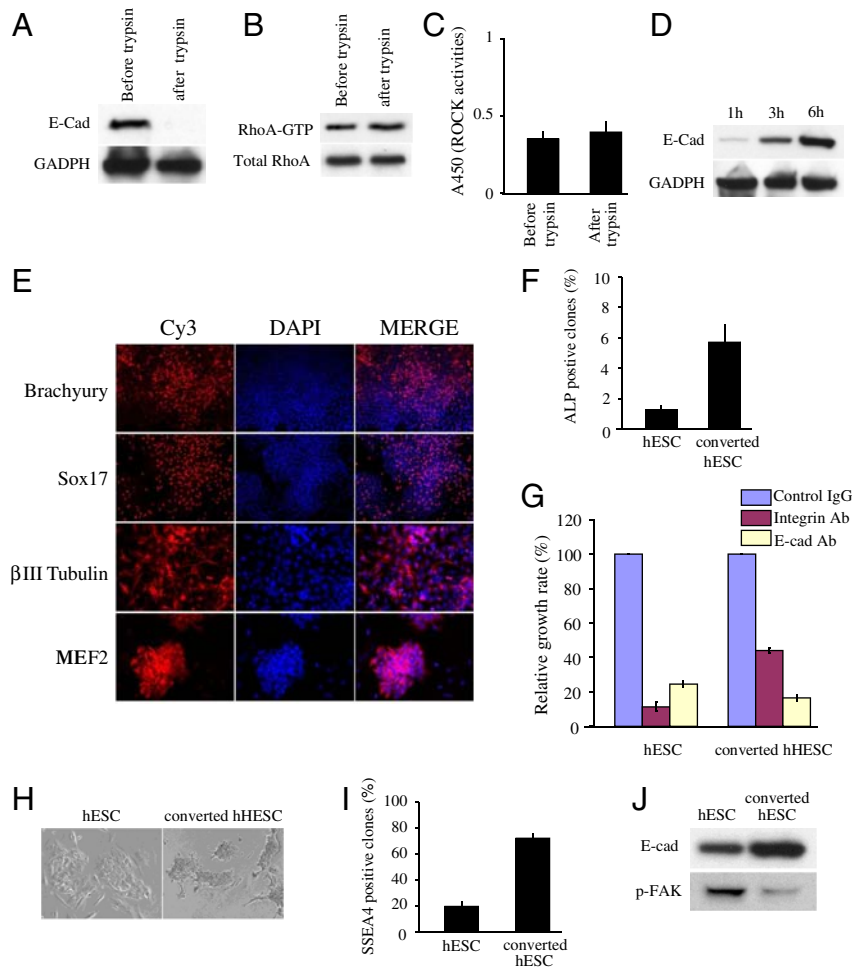

**Fig. S6.** Analysis of converted hESCs. (A) Western blot analysis of full-length E-cadherins in mESCs before and after trypsin. (B) Western blot showing the active Rho level in mESCs before or after trypsin. (C) Rho-kinase assay showing the ROCK activity before or after trypsin ( $n = 2$ ). (D) A time-course Western blot analysis of full-length E-cadherin expression in converted hESCs after trypsin dissociation for indicated time. (E) Immunostaining staining of Brachyury, Sox17 and  $\beta$ III Tubulin, different lineage marker in converted hESCs after various differentiation stimuli. (F) Ratio of ALP positive colonies for the conventional hESCs and converted hESCs ( $n = 2$ ). (G) hESCs grew two days on the Matrigel-coated plates in the presence of control IgG, integrin  $\beta$ 1-blocking antibodies and E-cadherin blocking antibodies (5–10  $\mu$ g/mL). The mean number of cells for each condition was normalized to the respective hESCs with nonspecific antibodies. (H) Phase contrast images and (I) percentage of SSEA4 positive conventional and converted hESC clones grown on gelatin-coated plates for five days ( $n = 3$ ). (J) Western blot showing E-cadherin and phosphorylated FAK levels in conventional hESCs and converted hESCs. All graphs show mean  $\pm$ SEM.
